# Supplementary material for: Macromolecular Design and Engineering of New Amphiphilic N-Vinylpyrrolidone Terpolymers for Biomedical Applications
Source: MDPI journal article supplement (doi:10.3390/ijms242015170), 2023-10-14
Supplement: s1 [file s1]

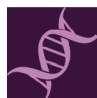

Supplementary Material

# Macromolecular Design and Engineering of New Amphiphilic N-Vinylpyrrolidone Terpolymers for Biomedical Applications

Svetlana V. Kurmaz <sup>1,\*</sup>, Evgenia O. Perepelitsina <sup>1</sup>, Sergey G. Vasiliev <sup>1</sup>, Irina A. Avilova <sup>1</sup>, Igor I. Khodos <sup>2</sup>, Vladimir A. Kurmaz <sup>1</sup>, Dmitry A. Chernyaev <sup>1</sup>, Yuliya V. Soldatova <sup>1</sup>, Natalia V. Filatova <sup>1</sup> and Irina I. Faingold <sup>1</sup>

<sup>1</sup> Federal Research Center of Problems of Chemical Physics and Medicinal Chemistry, Russian Academy of Sciences, 142432 Chernogolovka, Russia; jane@icp.ac.ru (E.O.P.); viesssw@mail.ru (S.G.V.); irkaavka@gmail.com (I.A.A.); kurmaz@icp.ac.ru (V.A.K.); chernyayevda@icp.ac.ru (D.A.C.); soldatovayv@gmail.com (Y.V.S.); natasha5555@yandex.ru (N.V.F.); ifaingold@mail.ru (I.I.F.)

<sup>2</sup> Institute of Microelectronics Technology and High-Purity Materials, Russian Academy of Sciences, 142432 Chernogolovka, Russia; khodos.igor@mail.ru

\* Correspondence: skurmaz@icp.ac.ru; Tel.: +7-496-522-10-89

**Figure S1:** The region of O-CH<sub>2</sub> and O-CH groups in <sup>13</sup>C NMR spectra of terpolymers used for the composition calculation.

**Figure S2:** Molecular weight distribution curves of the terpolymers and linear PVP.

**Figure S3:** MALS traces (a) and dependencies of macromolecules root mean square (rms) of radius gyration on (b) M and (c) V<sub>R</sub> for the studied terpolymers and linear PVP.

**Figure S4:** Semilogarithmic dependencies of light scattering intensity *I* on the terpolymer concentration in water at 22 °C.

**Figure S5:** Mass (MD) and number (ND) distribution on particle size (a) in FB7 and (b) FB8 water solution at different temperatures. [FB7] = 0.31 mg ml<sup>-1</sup>, [FB8] = 0.31 mg ml<sup>-1</sup>.

**Figure S6:** DSC curves of terpolymers FB8 at 1—3 heating cycle.

**Figure S7:** TG curves for the studied terpolymers at low degrees of conversion.

**Figure S8:** FTIR spectra of TP-FB7, TP-FB8 and TP-FB12, TP-PVP, TP in the regions: (a) of 4000—2400 cm<sup>-1</sup> and (b) 1800—400 cm<sup>-1</sup>.

**Figure S9:** Absorption spectra of TP-FB12 in water and water/ethanol mixture; cuvette is 1 cm.

**Citation:** Kurmaz, S.V.; Perepelitsina, E.O.; Vasiliev, S.G.; Avilova, I.A.; Khodos, I.I.; Kurmaz, V.A.; Chernyaev, D.A.; Soldatova, Y.V.; Filatova, N.V.; Faingold, I.I. Macromolecular Design and Engineering of New Amphiphilic N-Vinylpyrrolidone Terpolymers for Biomedical Applications. *Int. J. Mol. Sci.* **2023**, *24*, 15170. <https://doi.org/10.3390/ijms242015170>

Academic Editor: Ilya Nifant'ev

Received: 8 September 2023

Revised: 6 October 2023

Accepted: 11 October 2023

Published: 14 October 2023

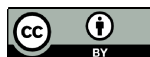

**Copyright:** © 2023 by the authors. Submitted for possible open access publication under the terms and conditions of the Creative Commons Attribution (CC BY) license (<https://creativecommons.org/licenses/by/4.0/>).

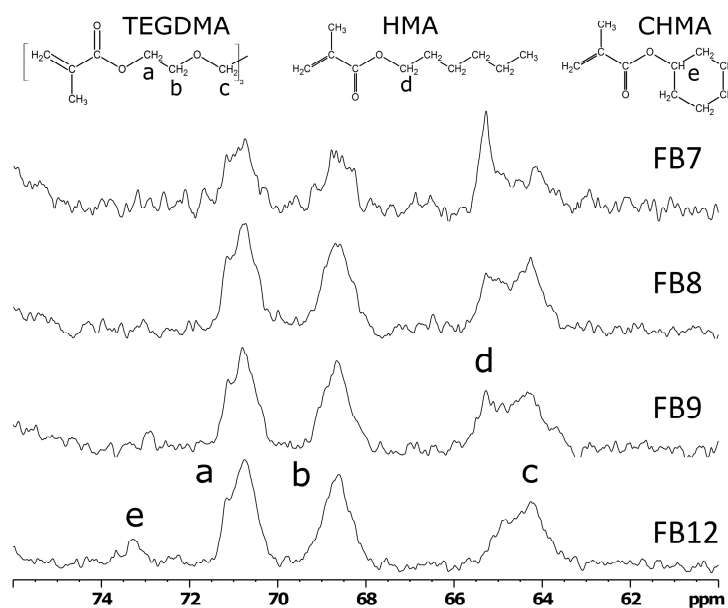

**Figure S1:** The region of O-CH<sub>2</sub> and O-CH groups in  $^{13}\text{C}$  NMR spectra of terpolymers used for the calculation of the composition.

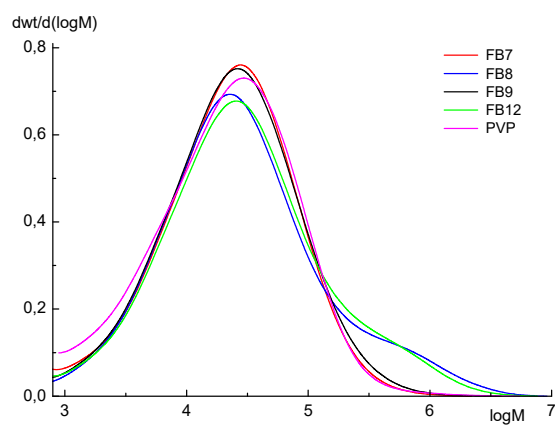

**Figure S2:** Molecular weight distribution curves of the terpolymers and linear PVP.

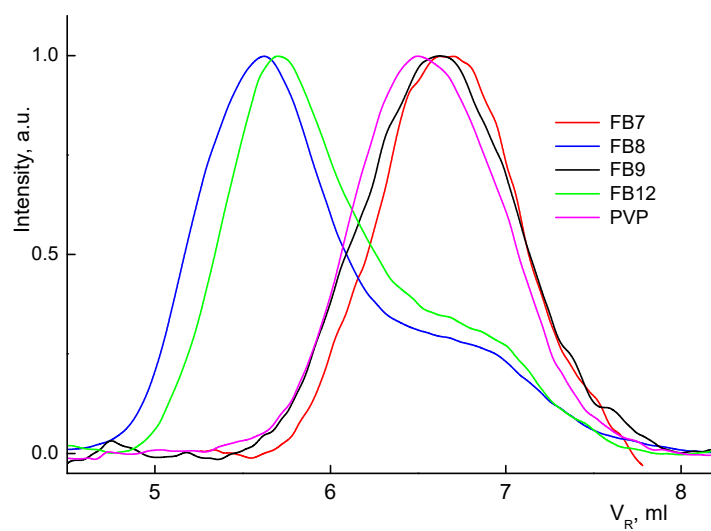

(a)

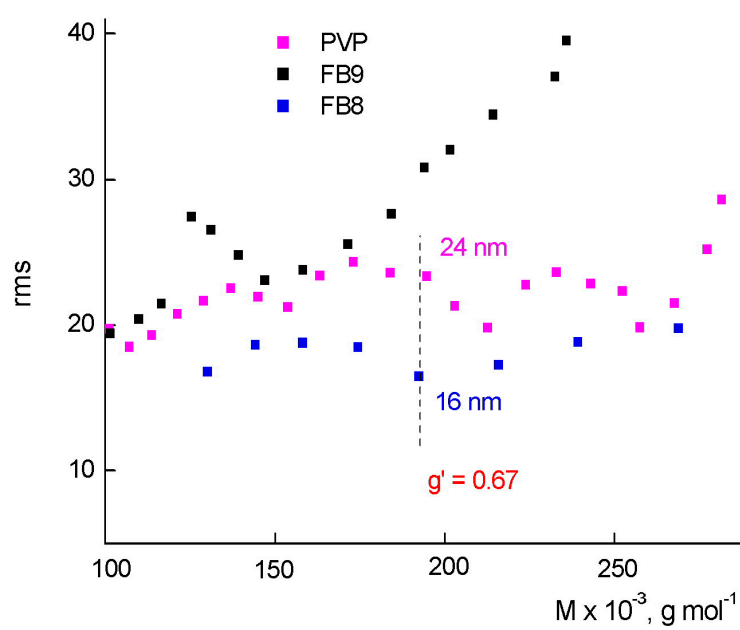

(b)

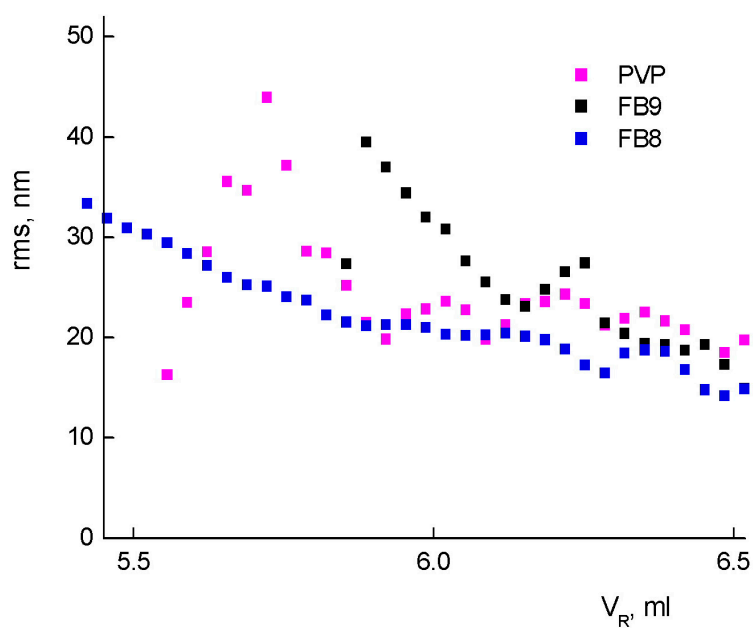

(c)

**Figure S3:** MALS traces (a) and dependencies of macromolecules root mean square (rms) of radius gyration on (b)  $M$  and (c)  $V_R$  for the studied terpolymers and linear PVP.

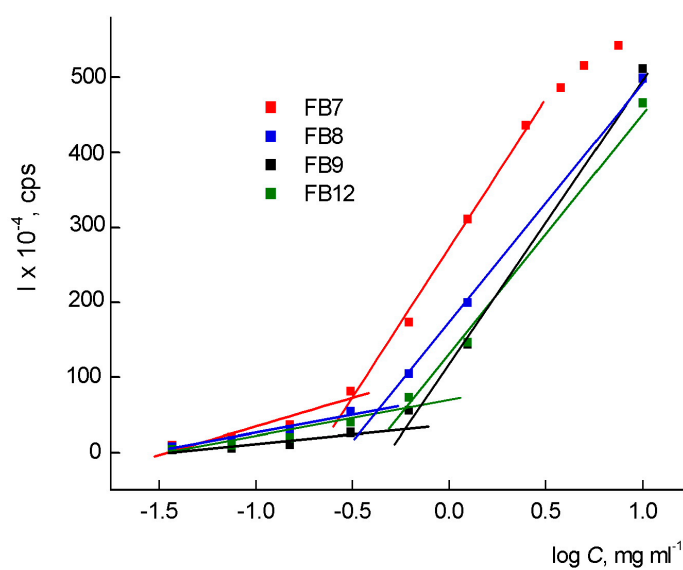

**Figure S4:** Semilogarithmic dependencies of light scattering intensity  $I$  on the terpolymer concentration in water at 22 °C.

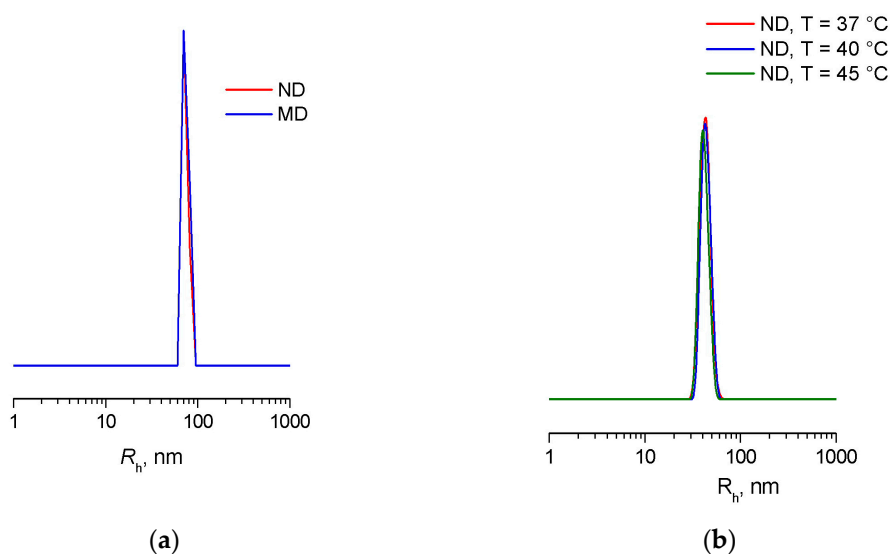

**Figure S5:** Mass (MD) and number (ND) distribution on particle size (a) in FB7 and (b) FB8 water solution at different temperatures. [FB7] = 0.31 mg ml<sup>-1</sup>, [FB8] = 0.31 mg ml<sup>-1</sup>.

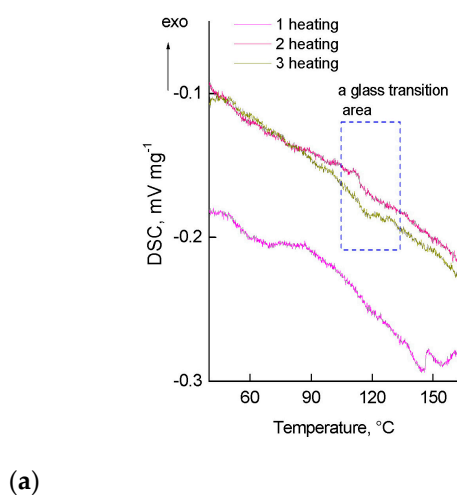

**Figure S6:** DSC curves of terpolymers FB8 at 1—3 heating cycle.

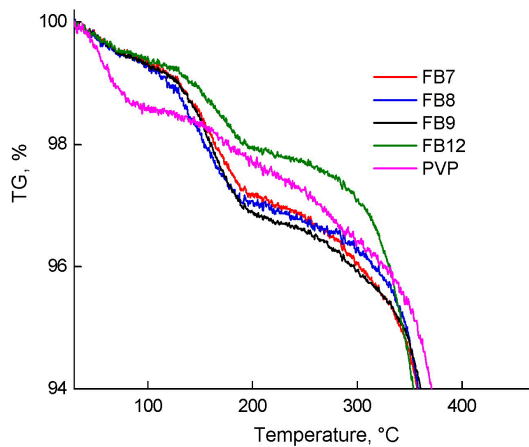

**Figure S7:** TG curves for the studied terpolymers at low degrees of conversion.

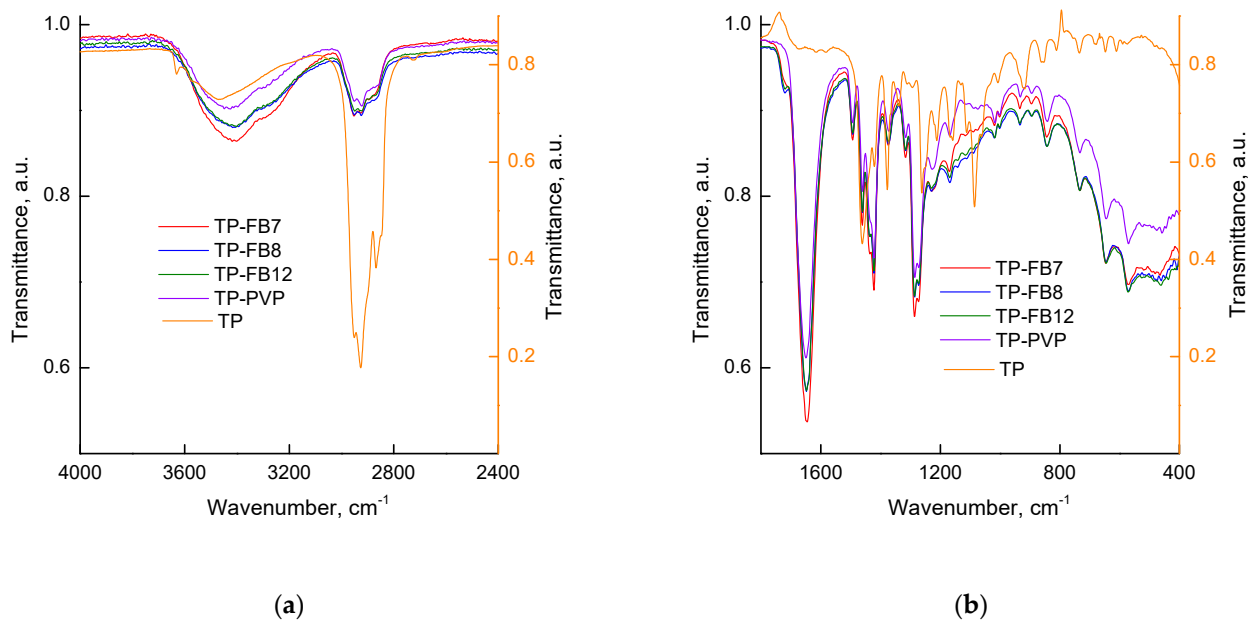

**Figure S8:** FTIR spectra of TP-FB7, TP-FB8 and TP-FB12, TP-PVP powders, and TP in the regions: (a) of 4000—2400  $\text{cm}^{-1}$  and (b) 1800—400  $\text{cm}^{-1}$ .

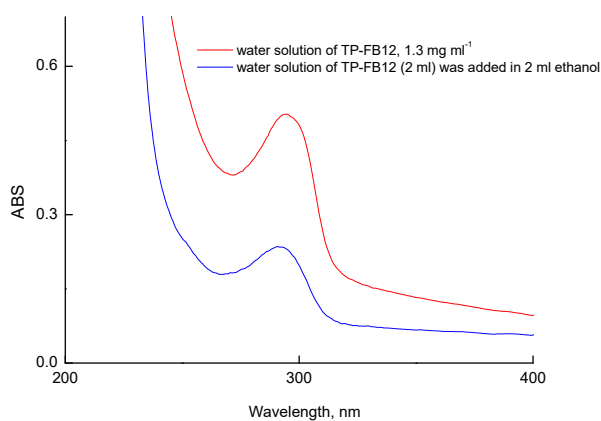

**Figure S9:** Absorption spectra of TP-FB12 in water and water/ethanol mixture; cuvette is 1 cm.
